# Supplementary material for: A series of isostructural lanthanide metal–organic frameworks: effective fluorescence sensing for Fe3+, 2,4-DNP and 4-NP
Source: Royal Society of Chemistry journal article supplement (doi:10.1039/d2ce00106c), 2022-01-01
Supplement: d2ce00106c1.pdf [file d2ce00106c1.pdf]

## Electronic Supplementary Information (ESI)

### A series of isostructural lanthanide metal-organic frameworks: effective fluorescence sensing for Fe<sup>3+</sup>, 2,4-DNP and 4-NP

Qianlan Hu, Tong Xu, Jiaming Gu, Lirong Zhang\* and Yunling Liu\*

State Key Laboratory of Inorganic Synthesis and Preparative Chemistry, College of Chemistry, Jilin University, Changchun 130012, P. R. China, E-mail: zlr@jlu.edu.cn; yunling@jlu.edu.cn

#### S1. Calculation of quenching efficiency, Stern-Volmer (S-V) equation and LOD.

##### Quenching efficiency:

$$\text{quenching efficiency} = (I_0 - I)/I_0 \times 100\%$$

$I_0$  is the fluorescence intensity values of JLU-MOF201-Y and JLU-MOF201-Tb.  $I$  is the fluorescence intensity value after adding the Fe<sup>3+</sup>.

##### Stern-Volmer (S-V) equation:

$$I_0/I = 1 + K_{sv}[C]$$

$I_0$  is the fluorescence intensity values of JLU-MOF201-Y and JLU-MOF201-Tb.  $I$  is the fluorescence intensity value after adding the Fe<sup>3+</sup>.  $K_{sv}$  is Stern-Volmer quenching constant.  $[C]$  is the concentration of the analyte.

##### LOD:

$$L = 3S_b/K$$

$S_b$  is standard deviation for compounds and  $K$  is slope of the Stern-Volmer.

S1. Supporting Figures.

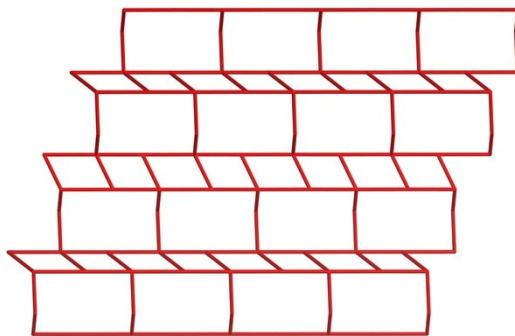

Fig. S1 3,4L83 topology of JLU-MOF201-Y.

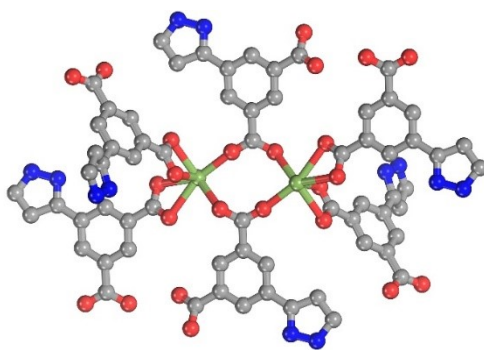

Fig. S2 Binuclear SBUs in JLU-MOF201-Y. Color scheme: carbon = gray, nitrogen = blue, oxygen = red, yttrium = green. (All H atoms and guest molecules are omitted for clarity)

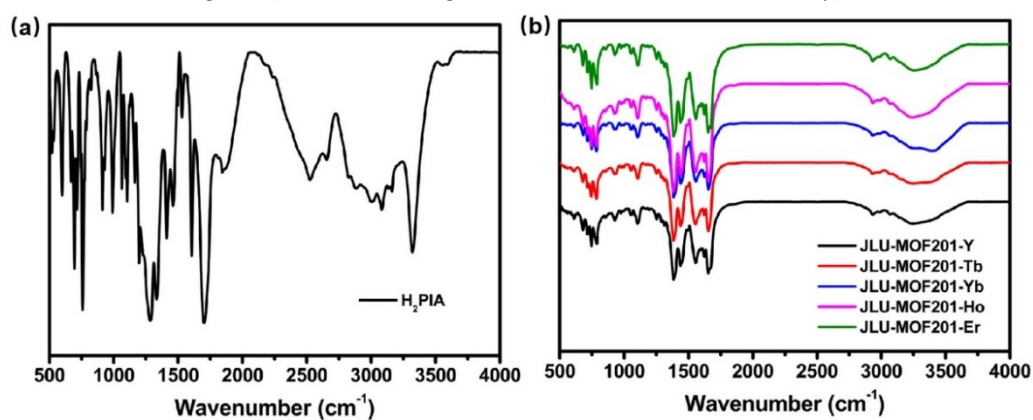

Fig. S3 The IR spectra of (a) H<sub>2</sub>PIA and (b) JLU-MOF201-Ln.

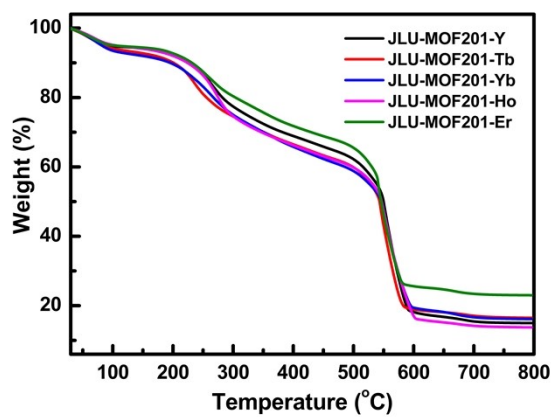

Fig. S4 Thermogravimetric analysis curves of JLU-MOF201-Ln for the as-synthesized samples.

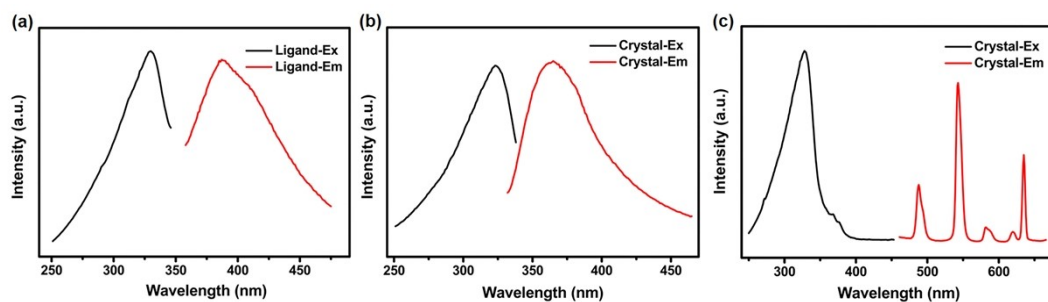

Fig. S5 Excitation and emission spectra of (a) H<sub>2</sub>PIA, (b) JLU-MOF201-Y and (c) JLU-MOF201-Tb.

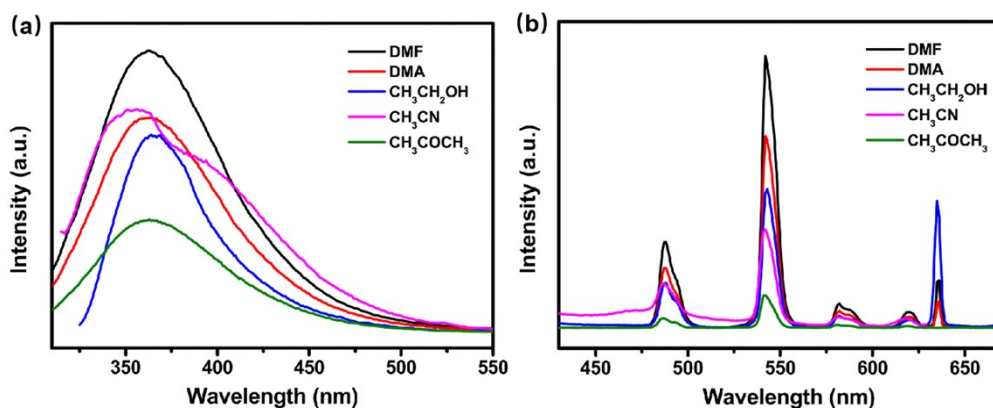

Fig. S6 Emission spectra of compounds (a) JLU-MOF201-Y and (b) JLU-MOF201-Tb in different solvents.

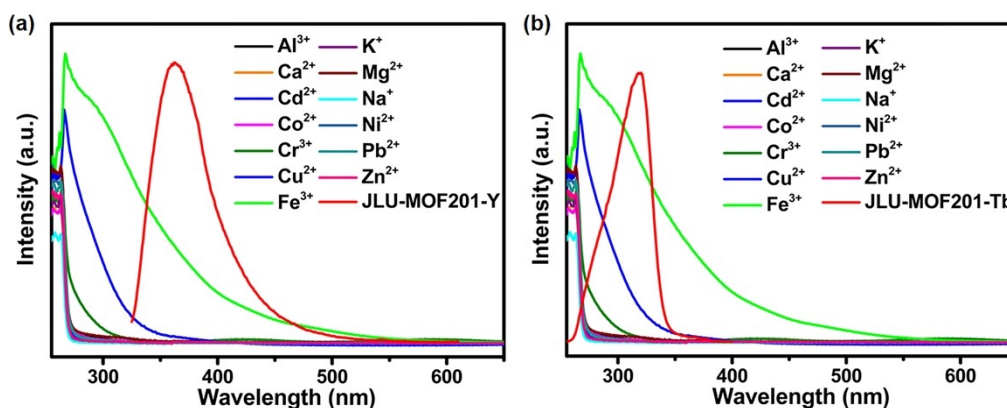

Fig. S7 UV-vis absorption spectra of different metal ions in DMF solution ( $5 \times 10^{-4} \text{ mol}\cdot\text{L}^{-1}$ ), emission spectrum of (a) JLU-MOF201-Y and excitation spectrum of (b) JLU-MOF201-Tb in DMF solution ( $2 \text{ mg}\cdot\text{mL}^{-1}$ ).

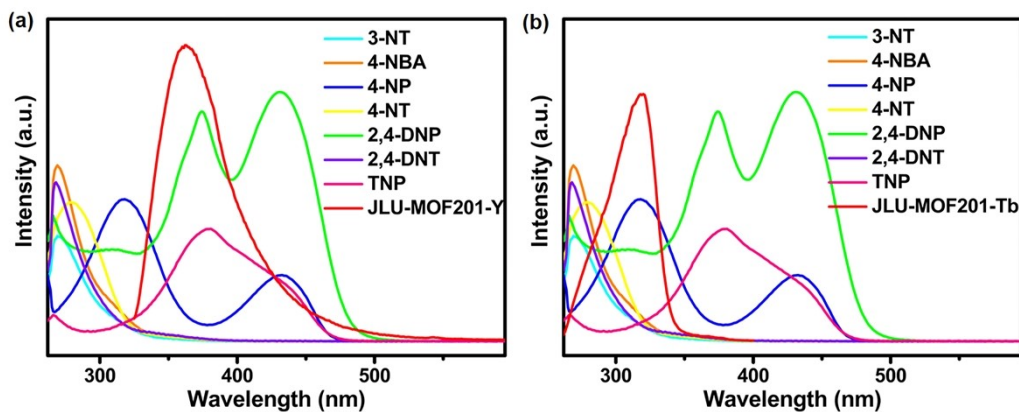

Fig. S8 UV-vis absorption spectra of different NAEs in DMF solution ( $1 \times 10^{-4} \text{ M}$ ) and emission spectrum of (a) JLU-MOF201-Y and (b) JLU-MOF201-Tb in DMF solution ( $2 \text{ mg}\cdot\text{mL}^{-1}$ ).

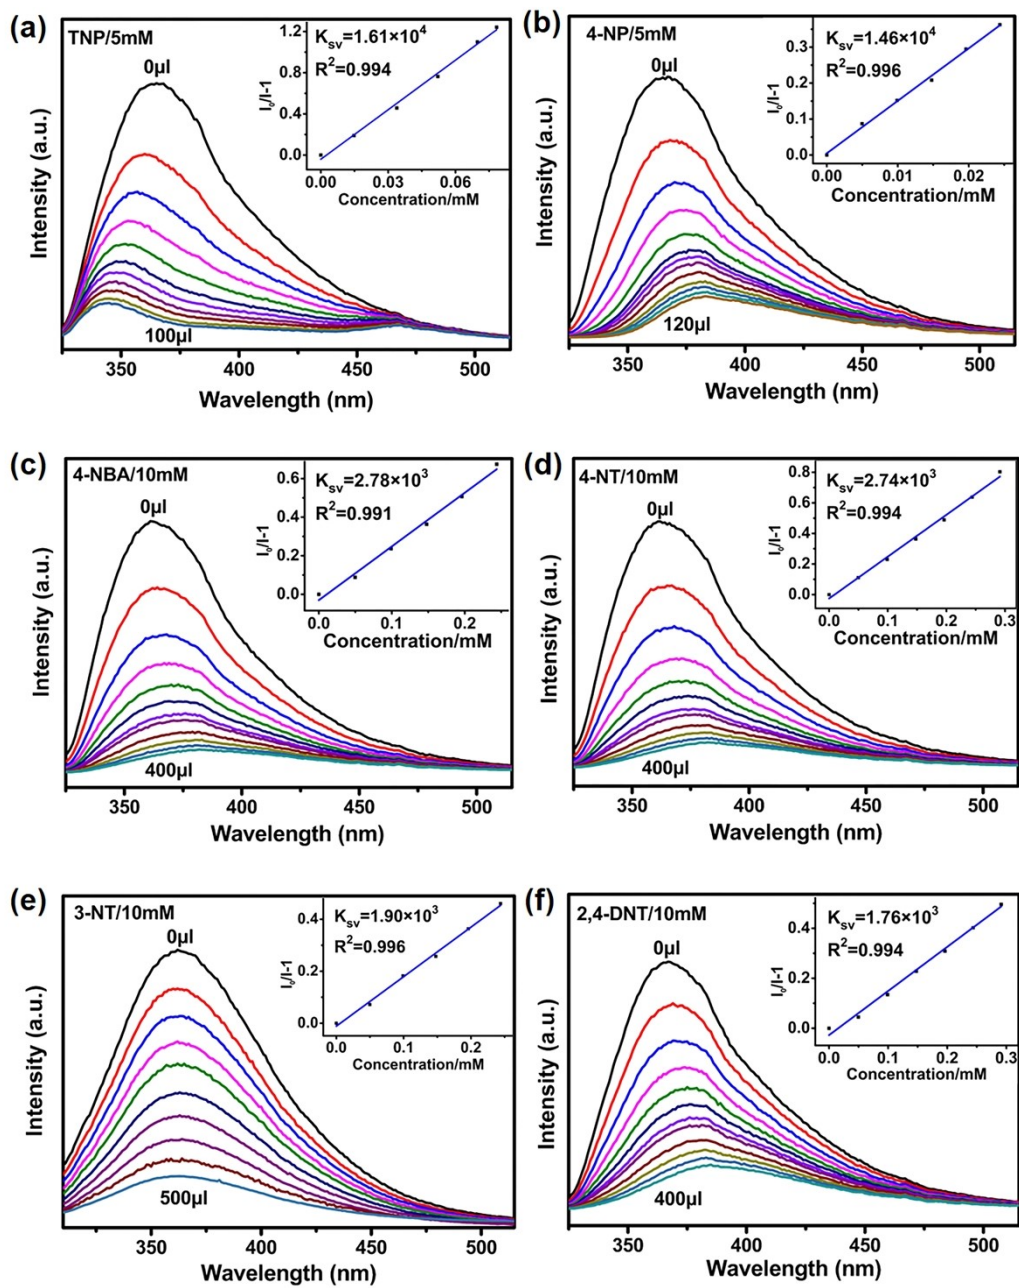

**Fig. S9** Influence on the emission spectra of JLU-MOF201-Y decentralized in DMF by gradual addition of (a) TNP, (b) 4-NP, (c) 4-NBA, (d) 4-NT, (e) 3-NT and (f) 2,4-DNT solution.

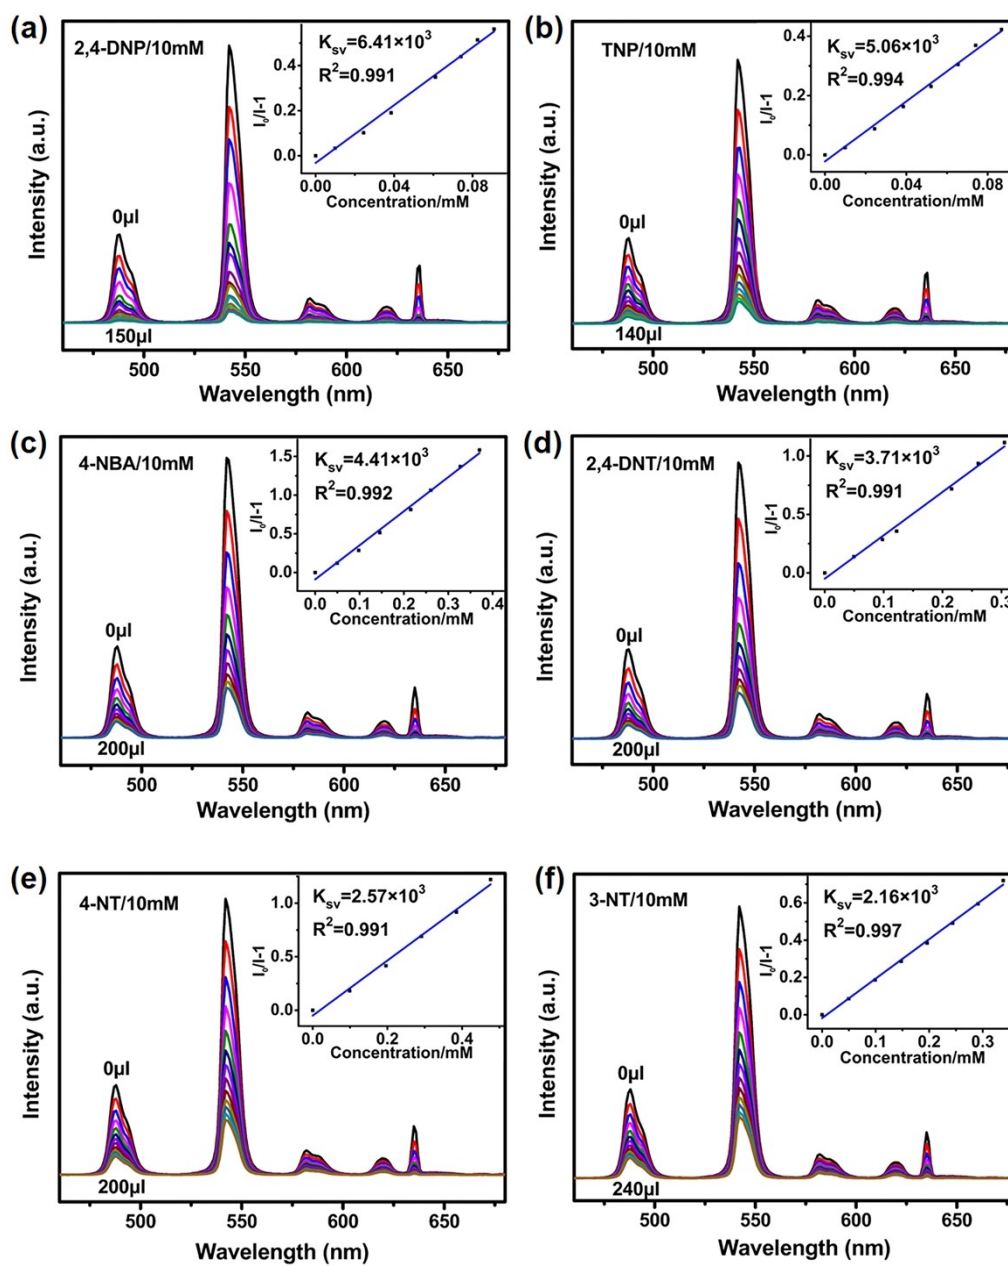

**Fig. S10** Influence on the emission spectra of JLU-MOF201-Y decentralized in DMF by gradual addition of (a) 2,4-DNP, (b) TNP, (c) 4-NBA, (d) 2,4-DNT, (e) 4-NT and (f) 3-NT solution.

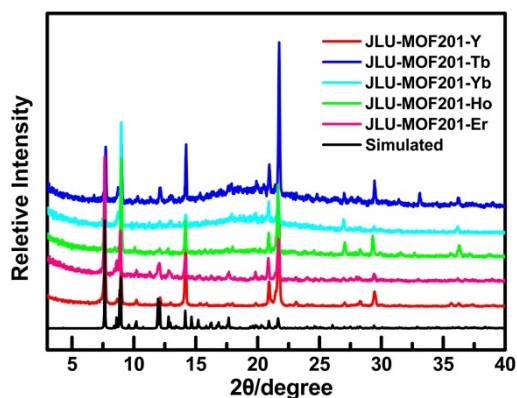

Fig. S11 PXRD patterns of JLU-MOF201-Y for simulated and as-synthesized samples of JLU-MOF201-Ln.

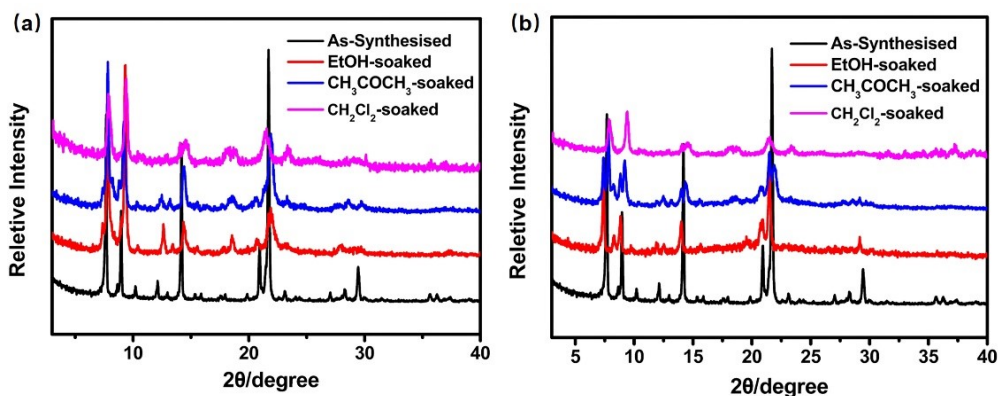

Fig. S12 PXRD patterns of (a) JLU-MOF201-Y and (b) JLU-MOF201-Tb as-synthesized and after soaking in different organic solvents.

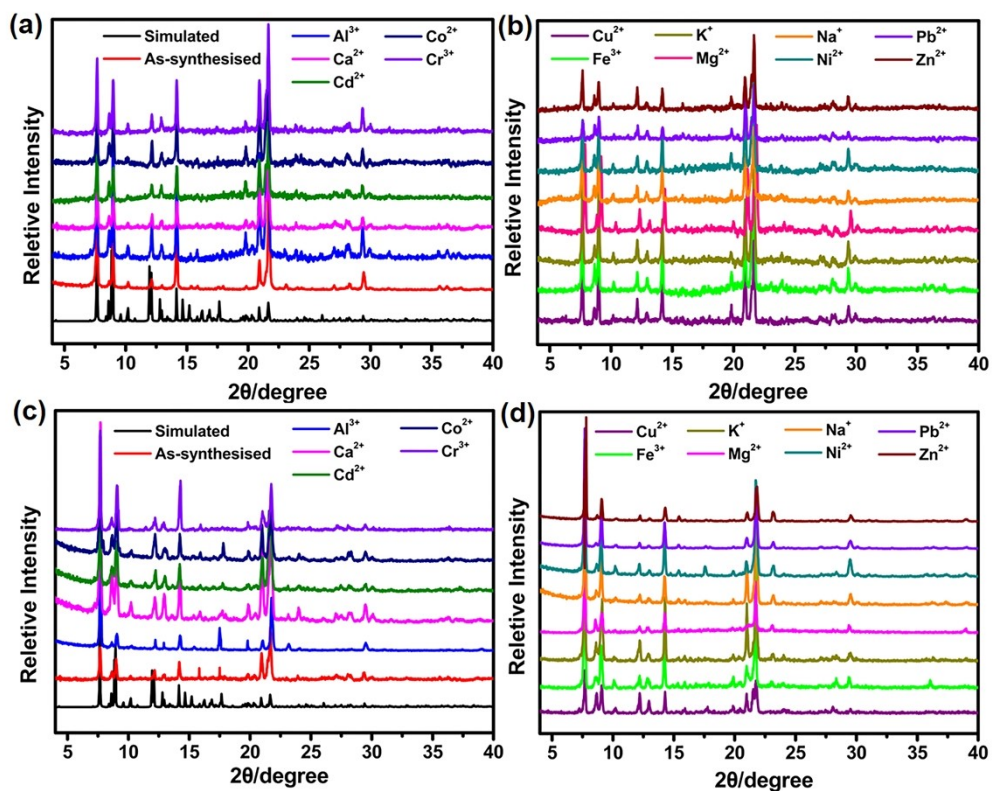

Fig. S13 PXRD patterns of JLU-MOF201-Y (a, b) and JLU-MOF201-Tb (c, d) as-synthesized and after soaking in

DMF solutions with different metal ions.

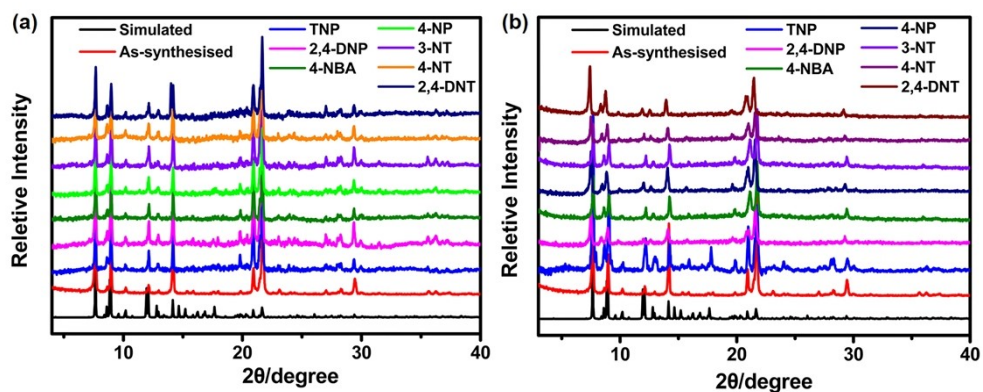

Fig. S14 PXRD patterns of as-synthesized JLU-MOF201-Y and samples after soaking in different NAEs DMF solution.

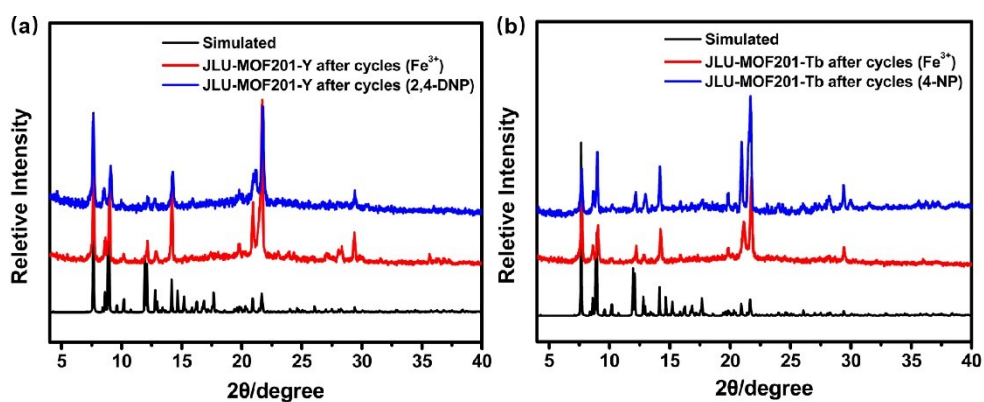

Fig. S15 PXRD patterns of JLU-MOF201-Y (a) and JLU-MOF201-Tb (b) as-synthesized and after four quenching-recovery cycles.

**S1. Supporting Tables.****Table S1.** Crystal data and structure refinements for the JLU-MOF201-Y.

| Parameters                                                                  | JLU-MOF201-Y                                                                  |
|-----------------------------------------------------------------------------|-------------------------------------------------------------------------------|
| Formula                                                                     | C <sub>43</sub> H <sub>42</sub> N <sub>9</sub> O <sub>16</sub> Y <sub>2</sub> |
| Formula weight                                                              | 1118.67                                                                       |
| Temperature(K)                                                              | 297.8                                                                         |
| Wavelength (Å)                                                              | 0.71073                                                                       |
| Crystal system                                                              | Monoclinic                                                                    |
| Space group                                                                 | <i>C2/c</i>                                                                   |
| <i>a</i> (Å)                                                                | 44.809(4)                                                                     |
| <i>b</i> (Å)                                                                | 10.8964(9)                                                                    |
| <i>c</i> (Å)                                                                | 25.255(2)                                                                     |
| $\alpha$ (°)                                                                | 90.00                                                                         |
| <i>B</i> (°)                                                                | 113.735(2)                                                                    |
| $\gamma$ (°)                                                                | 90.00                                                                         |
| volume (Å <sup>3</sup> )                                                    | 11287.9(17)                                                                   |
| Z, D <sub>x</sub> (g/cm <sup>3</sup> )                                      | 8, 1.317                                                                      |
| <i>F</i> (000)                                                              | 4552.0                                                                        |
| $\vartheta$ range (deg)                                                     | 2.39-24.26                                                                    |
| reflns collected/unique                                                     | 4927/10254                                                                    |
| <i>R</i> <sub>int</sub>                                                     | 0.1071                                                                        |
| data/restraints/params                                                      | 10254/779/638                                                                 |
| GOF on <i>F</i> <sup>2</sup>                                                | 1.069                                                                         |
| <i>R</i> <sub>1</sub> , <i>wR</i> <sub>2</sub> ( <i>I</i> > 2σ( <i>I</i> )) | 0.0837/0.1975                                                                 |
| <i>R</i> <sub>1</sub> , <i>wR</i> <sub>2</sub> (all data)                   | 0.1466/0.2258                                                                 |



**Table S2.** Unit cell data for the JLU-MOF201-Ln.

|                          | JLU-MOF201-Y | JLU-MOF201-Tb | JLU-MOF201-Yb | JLU-MOF201-Ho | JLU-MOF201-Er |
|--------------------------|--------------|---------------|---------------|---------------|---------------|
| Crystal system           | Monoclinic   | Monoclinic    | Monoclinic    | Monoclinic    | Monoclinic    |
| <i>a</i> (Å)             | 44.81        | 45.21         | 45.77         | 44.93         | 45.02         |
| <i>b</i> (Å)             | 10.90        | 10.98         | 11.06         | 10.90         | 10.91         |
| <i>c</i> (Å)             | 25.26        | 25.34         | 25.73         | 25.23         | 25.26         |
| $\alpha$ (°)             | 90.00        | 90.00         | 90.00         | 90.00         | 90.00         |
| $\beta$ (°)              | 113.74       | 113.76        | 113.44        | 113.73        | 113.45        |
| $\gamma$ (°)             | 90.00        | 90.00         | 90.00         | 90.00         | 90.00         |
| volume (Å <sup>3</sup> ) | 11287        | 11514         | 11950         | 11309         | 11387         |

**Table S3.** A comparison of  $K_{sv}$  and LODs values of luminescent MOFs for  $Fe^{3+}$  detection.

| MOFs                                                         | $K_{sv}$ ( $M^{-1}$ )                | LOD ( $\mu M$ )       | Ref.             |
|--------------------------------------------------------------|--------------------------------------|-----------------------|------------------|
| $[Zr_6O_6(OH)_2(CF_3COO)_2(C_{11}H_5NO_4)_4(H_2O)_4]$        | $2.25 \times 10^7$                   | $1.70 \times 10^{-3}$ | 1                |
| $[Zn_2Na_2(TPHC)(4,4-Bipy)(DMF)] \cdot 8H_2O$                | $5.57 \times 10^4$                   | 6.40                  | 2                |
| $[EuDTTA(DMF)_3]NO_3$                                        | $3.63 \times 10^4$                   | 4.14                  | 3                |
| $\{[Cd(tptb)(H_2DOBD)(H_2O)] \cdot DMF\}_n$                  | $3.00 \times 10^4$                   | $1.67 \times 10^{-5}$ | 4                |
| $[Tb(L_2)(H_2O)(DMF)]_n$                                     | $2.89 \times 10^4$                   | 0.91                  | 5                |
| $\{[Eu(L)(H_2O)] \cdot 4H_2O\}_n$                            | $1.88 \times 10^4$                   | 0.57                  | 6                |
| $\{[Tb(L)(H_2O)] \cdot 7H_2O\}_n$                            | $1.48 \times 10^4$                   | 1.26                  | 7                |
| <b><math>[Tb_2(PIA)_3(DMF)_3(CH_3OH)]</math></b>             | <b><math>8.83 \times 10^4</math></b> | <b>2.49</b>           | <b>This work</b> |
| FJI-C8 (Zn)                                                  | $8.25 \times 10^3$                   | 23.3                  | 8                |
| <b><math>[Y_2(PIA)_3(DMF)_3(CH_3OH)]</math></b>              | <b><math>7.67 \times 10^3</math></b> | <b>2.21</b>           | <b>This work</b> |
| 534-MOF-Tb(L11)                                              | $5.51 \times 10^3$                   | 130                   | 9                |
| $[Zn_2(cptpy)(btc)(H_2O)]_n$                                 | $5.46 \times 10^3$                   | 4.33                  | 10               |
| $[Zr_6O_4(OH)_4(C_8H_2O_4S_2)_6] \cdot DMF \cdot 18H_2O$     | $4.41 \times 10^3$                   | 1.26                  | 11               |
| $[Zn(3-bpmh)(HEA) \cdot H_2O]_n$                             | $4.14 \times 10^3$                   | 0.89                  | 12               |
| $\{[Eu(BIPATC)_{0.5}(DMA)_2(NO_3)] \cdot DMA \cdot H_2O\}_n$ | $3.89 \times 10^3$                   | -                     | 13               |
| $[Zn(HBCPBA)(tpim)] \cdot H_2O$                              | $3.57 \times 10^3$                   | -                     | 14               |
| $\{[Eu(TMCA)(DEF)(H_2O)] \cdot (CH_3CN)\}_n$                 | $1.84 \times 10^3$                   | 30.10                 | 15               |

**Table S4.** A comparison of  $K_{sv}$  and LODs values of luminescent MOFs for 2,4-DNP detection.

| MOFs                                                           | $K_{sv}$ ( $M^{-1}$ )                | LOD ( $\mu M$ )       | Ref.             |
|----------------------------------------------------------------|--------------------------------------|-----------------------|------------------|
| $[Cd_2(TPA)_2(BIYB)_2]_n$                                      | $1.60 \times 10^5$                   | 0.13                  | 16               |
| $[Zn_5(DpImDC)_2(DMF)_4(H_2O)_3] \cdot H_2O \cdot DMF$         | $8.70 \times 10^4$                   | -                     | 17               |
| $[Cd(TTPBA-4)_2(OH)_2 \cdot H_2O]_n$                           | $4.10 \times 10^4$                   | $9.50 \times 10^{-3}$ | 18               |
| <b><math>[Y_2(PIA)_3(DMF)_3(CH_3OH)]</math></b>                | <b><math>3.63 \times 10^4</math></b> | <b>0.46</b>           | <b>This work</b> |
| Sc-EBTC                                                        | $2.85 \times 10^4$                   | $4.30 \times 10^{-5}$ | 19               |
| $[Zn_2(TCPE)(tta)_2] \cdot 2DMF \cdot 4H_2O \cdot 2Me_2NH_2^+$ | $2.60 \times 10^4$                   | $6.12 \times 10^{-5}$ | 20               |
| $\{[(CH_3)_2NH_2]_6[Cd_5(L)_4] \cdot H_2O \cdot 3DMF\}_n$      | $2.37 \times 10^4$                   | $4.57 \times 10^{-3}$ | 21               |
| $\{(NH_2(CH_3)_2)[Zn_4(ddn)_2(COO)(H_2O)_4] \cdot solvent\}_n$ | $0.89 \times 10^4$                   | $8.75 \times 10^{-3}$ | 22               |

**Table S5.** A comparison of the values of  $K_{sv}$  and LODs of luminescent MOFs for the detection of 4-NP.

| MOFs                                                                            | $K_{sv}$ ( $M^{-1}$ )                | LOD ( $\mu M$ )       | Ref.             |
|---------------------------------------------------------------------------------|--------------------------------------|-----------------------|------------------|
| $[Eu_{0.5}Tb_{0.5}(L)(H_2O)_3]_n$                                               | $7.50 \times 10^6$                   | -                     | 23               |
| $\{[Tb(HL)] \cdot 3DMF \cdot 3H_2O\}_n$                                         | $3.60 \times 10^5$                   | $2.33 \times 10^{-8}$ | 24               |
| $\{[Cd_{3.5}(\mu_3-OH)(TCPB)_2(bimb)(H_2O)_3] \cdot 0.5dioxane \cdot 0.5H_2O\}$ | $3.80 \times 10^4$                   | $0.49 \times 10^{-3}$ | 25               |
| <b><math>[Tb_2(PIA)_3(DMF)_3(CH_3OH)]</math></b>                                | <b><math>1.89 \times 10^4</math></b> | <b>1.01</b>           | <b>This work</b> |
| Eu-CP                                                                           | $1.38 \times 10^4$                   | $3.00 \times 10^{-9}$ | 26               |
| $[Cd(L)(phen)_2] \cdot 5H_2O$                                                   | $5.13 \times 10^3$                   | $1.15 \times 10^{-5}$ | 27               |

**Table S6.** The  $K_{sv}$  and LODs values of JLU-MOF201-Y and JLU-MOF201-Tb for the detection of NAEs.

| NAEs    | JLU-MOF201-Y          |                 | JLU-MOF201-Tb         |                 |
|---------|-----------------------|-----------------|-----------------------|-----------------|
|         | $K_{sv}$ ( $M^{-1}$ ) | LOD ( $\mu M$ ) | $K_{sv}$ ( $M^{-1}$ ) | LOD ( $\mu M$ ) |
| 2,4-DNP | $3.36 \times 10^4$    | 0.46            | $6.41 \times 10^3$    | 2.99            |
| 4-NP    | $1.46 \times 10^4$    | 1.15            | $1.89 \times 10^4$    | 1.01            |
| TNP     | $1.16 \times 10^4$    | 1.04            | $5.06 \times 10^3$    | 3.79            |
| 4-NBA   | $2.78 \times 10^3$    | 6.05            | $4.41 \times 10^3$    | 4.35            |
| 3-NT    | $1.90 \times 10^3$    | 8.85            | $2.16 \times 10^3$    | 8.87            |
| 4-NT    | $2.74 \times 10^3$    | 6.14            | $2.57 \times 10^3$    | 7.46            |
| 2,4-DNT | $1.76 \times 10^3$    | 9.60            | $3.71 \times 10^3$    | 5.17            |

**Table S7.** The ICP data of JLU-MOF201-Y and  $Fe^{3+}$ @JLU-MOF201-Y.

| Compounds                | $Y^{3+}$ (ppm) | $Fe^{3+}$ (ppm) |
|--------------------------|----------------|-----------------|
| JLU-MOF201-Y             | 17.96          | -               |
| $Fe^{3+}$ @ JLU-MOF201-Y | 23.95          | 0.11            |

**Table S8.** The ICP data of JLU-MOF201-Tb and  $Fe^{3+}$ @JLU-MOF201-Tb.

| Compounds                 | $Tb^{3+}$ | $Fe^{3+}$ |
|---------------------------|-----------|-----------|
| JLU-MOF201-Tb             | 18.24     | -         |
| $Fe^{3+}$ @ JLU-MOF201-Tb | 25.83     | 0.19      |

## References

1. C. Gogoi and S. Biswas, *Dalton Trans.*, 2018, **47**, 14696-14705.
2. C. Yu, X. Sun, L. Zou, G. Li, L. Zhang and Y. Liu, *Inorg. Chem.*, 2019, **58**, 4026-4032.
3. Y. Zhang, L. Wu, M. Feng, D. Wang and C. Li, *J. Solid State Chem.*, 2021, **294**, 121868.
4. Y. P. Li, S. F. Li, X. Geng, R. D. Wang, L. C. He, S. Y. Wang, L. Du and Q. H. Zhao, *Inorg. Chem. Commun.*, 2021, **128**, 108604.
5. X. Mi, D. Sheng, Y. Yu, Y. Wang, L. Zhao, J. Lu, Y. Li, D. Li, J. Dou, J. Duan and S. Wang, *ACS. Appl. Mater. Interfaces*, 2019, **11**, 7914-7926.
6. B. Li, J. P. Dong, Z. Zhou, R. Wang, L. Y. Wang and S. Q. Zang, *J. Mater. Chem. C*, 2021, **9**, 3429-3439.
7. J. P. Dong, B. Li, Y. J. Jin and L. Y. Wang, *CrystEngComm*, 2021, **23**, 1677-1683.
8. C. H. Chen, X. S. Wang, L. Li, Y. B. Huang and R. Cao, *Dalton Trans.*, 2018, **47**, 3452-3458.
9. M. Chen, W. M. Xu, J.-Y. Tian, H. Cui, J. X. Zhang, C.-S. Liu and M. Du, *J. Mater. Chem. C*, 2017, **5**, 2015-2021.
10. H. Chen, P. Fan, X. Tu, H. Min, X. Yu, X. Li, J. L. Zeng, S. Zhang and P. Cheng, *Chem. Asian. J.*, 2019, **14**, 3611-3619.
11. R. Dalapati, U. Kokcam-Demir, C. Janiak and S. Biswas, *Dalton Trans.*, 2018, **47**, 1159-1170.
12. Y. Wang, Y. Zhao, H. Yu, Z.-Q. Liu, L.-J. Wang, R.-Y. Huang, W. Xu and J.-F. Wu, *J. Solid State Chem.*, 2020, **288**, 121404.
13. X. Wang, Y. Wang, X. Wang, K. Lu, W. Jiang, P. P. Cui, H. Hao and F. Dai, *Dalton Trans.*, 2020, **49**, 15473-15480.
14. X. Liu, L. Zhao, C. Zhao, L. Meng and C. Liu, *Journal of Molecular Structure*, 2019, **1188**, 238-243.
15. G. M. Liang, S. Wang, M. Y. Xu, H.-L. Chen, G. Y. Liang, L. C. Gui and X. J. Wang, *CrystEngComm*, 2020, **22**, 6161-6169.
16. X. Wang, Y. Han, X. X. Han, X. Hou, J.-J. Wang and F. Fu, *New J. Chem.*, 2018, **42**, 19844-19852.
17. J. Li, X. Luo, Y. Zhou, L. Zhang, Q. Huo and Y. Liu, *Cryst. Growth Des.*, 2018, **18**, 1857-1863.
18. I. E. Khalil, T. Pan, Y. Shen and W. Zhang, *Inorg. Chem. Commun.*, 2020, **120**, 108170.
19. D. Zhan, A. Saeed, Z. Li, C. Wang, Z. Yu, J. Wang, N. Zhao, W. Xu and J. Liu, *Dalton Trans.*, 2020, **49**, 17737-17744.
20. X. Zhang, G. Ren, M. Li, W. Yang and Q. Pan, *Cryst. Growth Des.*, 2019, **19**, 6308-6314.
21. L. Lu, J. Wu, J. Wang, J. Q. Liu, B. H. Li, A. Singh, A. Kumar and S. R. Batten, *CrystEngComm*, 2017, **19**, 7057-7067.
22. A. Ma, J. Wu, Y. Han, F. Chen, B. Li, S. Cai, H. Huang, A. Singh, A. Kumar and J. Liu, *Dalton Trans.*, 2018, **47**, 9627-9633.
23. X. Cheng, J. Hu, J. Li and M. Zhang, *J. Lumin.*, 2020, **221**, 117100.
24. Z. G. Lin, F. Q. Song, H. Wang, X. Q. Song, X. X. Yu and W. S. Liu, *Dalton Trans.*, 2021, **50**, 1874-1886.
25. J. Zhang, L. Gao, Y. Wang, L. Zhai, X. Niu and T. Hu, *New J. Chem.*, 2019, **43**, 16853-16859.
26. Y. Liu, J. Ma, C. Xu, Y. Yang, M. Xia, H. Jiang and W. Liu, *Dalton Trans.*, 2018, **47**, 13543-13549.
27. S. S. Chen, Z. Y. Zhang, R. B. Liao, Y. Zhao, C. Wang, R. Qiao and Z. D. Liu, *Inorg. Chem.*, 2021, **60**, 4945-4956.
